# Supplementary material for: Identification of CTLA-4 associated with tumor microenvironment and competing interactions in triple negative breast cancer by co-expression network analysis
Source: PubMed Central journal article supplement (PMC7532512; doi:10.7150/jca.46301), 2020-09-09
Supplement: jcav11p6365s1.pdf [file jcav11p6365s1.pdf]

Table S1 Clinical features of 903 breast cancer patients in TCGA database

| <b>Molecular type</b> | <b>n</b> | <b>Age(mean)</b> | <b>Age(sd)</b> | <b>percent</b> |
|-----------------------|----------|------------------|----------------|----------------|
| Luminal               | 726      | 59.33            | 13.46          | 80.4%          |
| Her-2+                | 33       | 58.24            | 13.37          | 3.7%           |
| TNBC                  | 144      | 55.18            | 12.04          | 15.9%          |
| total                 | 903      | 58.63            | 13.2           | 100%           |

Table S2 Clinical features of 195 breast cancer patients in GEO database

| <b>Molecular type</b> | <b>n</b> | <b>Age(mean)</b> | <b>Age(sd)</b> | <b>percent</b> |
|-----------------------|----------|------------------|----------------|----------------|
| TNBC(GSE103091)       | 107      | 56.97            | 12.68          | 54.9%          |
| Non-TNBC(GSE20711)    | 88       | 55.97            | 11.46          | 45.1%          |
| total                 | 195      | 56.52            | 12.19          | 100%           |
